# Supplementary material
Source: HighWire-hosted journal article supplement (https://www.cmajopen.ca/content/suppl/2022/07/12/10.3.E652)
Supplement: open-2021-0302-original-submission.pdf [file open-2021-0302-original-submission.pdf]

1  
2  
3  
4  
5  
6 **Patient Empowerment Brochures to Promote Gabapentinoid Deprescribing: Protocol for the**  
7 **Prospective Controlled Before-and-After GABA-WHY Study**  
8  
9

10 Authors: Jerome Williams, BSc<sup>1</sup>, Marc-Alexandre Gingras, MD MSc<sup>1</sup>, Robert Dubé, MSc<sup>1</sup>, Todd C.  
11  
12 Lee, MD MPH<sup>1,2</sup>, Emily G. McDonald, MDCM MSc<sup>1,2</sup>  
13  
14  
15  
16  
17

18 <sup>1</sup>Department of Medicine, McGill University, Montreal, Canada  
19

20 <sup>2</sup>Clinical Practice Assessment Unit, Department of Medicine, McGill University Health Centre,  
21  
22 Montreal, Quebec, Canada  
23  
24  
25  
26  
27  
28

29 **Funding Statement:**  
30

31 This study is funded by the McGill University Department of Medicine Clinical Practice  
32  
33 Assessment Unit and through a research bursary from the McGill University General Internal  
34  
35 Medicine Fellowship Program.  
36  
37  
38

39 **Disclosures/Conflicts of Interest:**  
40

41 Dr. McDonald and Dr. Lee receive salary support from the Fonds de Recherche Quebec - Santé  
42  
43 and jointly hold the copyright for MedSafer, a deprescribing software that links to the Canadian  
44  
45 Deprescribing Network patient empowerment brochures used in this study.  
46  
47  
48

49 **Ethics:**  
50

51 Ethics was granted by the McGill University Health Centre (MUHC) Research Ethics Board.  
52  
53

54 **Contributor Statement:**  
55  
56  
57  
58  
59  
60

1  
2  
3 Emily McDonald, Todd Lee, and Marc-Alexandre Gringas are responsible for the study design,  
4  
5 literature review, and ethics approval. Robert Dubé and Jérôme Williams are involved in  
6  
7 participant recruitment and data collection. All authors contributed to the drafting of the  
8  
9 manuscript and to critical revisions. Each author approves the publication of the manuscript and  
10  
11  
12  
13 Dr. McDonald acts as guarantor of the work  
14

15  
16 **Corresponding Author:**

17  
18 Emily McDonald MD MSc  
19 Centre for Outcomes Research and Evaluation  
20 5252 De Maisonneuve Boulevard  
21 Office 3E.03  
22 Montreal, Quebec, Canada  
23 H4A 329  
24 [emily.mcdonald@mcgill.ca](mailto:emily.mcdonald@mcgill.ca)  
25  
26  
27

28  
29 **Study Registration:**

30  
31 NCT04855578  
32

33  
34 **Reporting Guideline Checklist:**

35  
36 SPIRIT  
37  
38  
39  
40  
41  
42  
43  
44  
45  
46  
47  
48  
49  
50  
51  
52  
53  
54  
55  
56  
57  
58  
59  
60

## **Abstract:**

Background: Off-label gabapentinoid use is common among hospitalized medical patients, who are at risk of adverse drug events. Despite this, only a minority have targeted attempts at deprescribing during hospitalization. We aim to demonstrate that patient empowerment deprescribing brochures can augment gabapentinoid deprescribing in the hospital.

Methods: This prospective controlled before-and-after trial will evaluate the impact of educational brochures distributed to patients on medical wards of 2 hospitals in Montreal, Canada. The primary outcome is the proportion of patients with a gabapentinoid deprescribed at 8-weeks post discharge, compared to usual care. Eligibility includes a gabapentinoid prescription and age 60 years or older. Exclusion criteria are known seizure disorder, severe cognitive impairment, an expected prognosis of less than 3 months, or inability to read English or French.

We aim to recruit 160 participants, with a 1:1 distribution between the intervention and control groups. The control period event rate is expected to be 13% based on a prior observational study at our center. The sample size was calculated to detect an absolute increase of 20% in deprescribing with the intervention (two-sided type 1 error of 5% and 80% power) and accounts for up to 15% loss to follow up, including death in hospital and post-discharge.

1  
2  
3 Interpretation: If successful, this would be a scalable intervention to reduce gabapentinoid  
4  
5 overuse by encouraging deprescribing conversations between patients and their healthcare  
6  
7 provider. Results of the study will be disseminated through publication in a peer reviewed journal  
8  
9  
10 and through presentation at a conference.  
11  
12  
13  
14  
15

16 Trial registration: NCT04855578  
17  
18  
19  
20  
21  
22  
23  
24  
25  
26  
27  
28  
29  
30  
31  
32  
33  
34  
35  
36  
37  
38  
39  
40  
41  
42  
43  
44  
45  
46  
47  
48  
49  
50  
51  
52  
53  
54  
55  
56  
57  
58  
59  
60

Confidential

## Introduction

The gabapentinoids are a class of antiepileptic drugs which includes gabapentin and pregabalin. Both bind voltage-gated calcium channels in the central nervous system, inhibiting neuronal calcium influx and consequently release of excitatory neurotransmitters. Since their initial release, the FDA and Health Canada have approved the use of gabapentin and pregabalin for treatment of postherpetic neuralgia, with additional indications for pregabalin including painful diabetic neuropathy, fibromyalgia and neuropathic pain associated with spinal cord injury [1-4].

Despite a short list of approved indications, gabapentinoid prescriptions have soared in the past decade in both the United States and Canada [5, 6]. In 2016, more than 4.4 billion US dollars were spent on pregabalin, making it the eighth highest invoice spending drug in the United States [7]. The rise in gabapentinoid prescriptions has been largely driven by its popularity for various off-label indications related to chronic pain, such as various types of neuropathic pain, osteoarthritis, chronic lower back pain, sciatica, and cancer-related pain, despite a lack of evidence [8]. Some of these uses have been the subject of negative clinical trials [9-13]. In areas where there is trial evidence, the benefit of treatment is limited by a high risk of adverse events at studied doses, leading to frequent drug discontinuation [13]. Common side effects of gabapentinoids include sedation, dry mouth, lower extremity edema and traumatic falls in older adults [14, 15].

There is a high prevalence of chronic gabapentinoid use in hospitalized patients with as many as 1 in 8 patients prescribed the drug prior to admission [16]. When evaluating these patients, fewer than 1 in 5 of them are using the drug for a clear FDA or Health Canada approved

1  
2  
3 indication, and the medication is rarely stopped at discharge [16]. Gabapentinoid users are also  
4  
5 more likely to be co-prescribed opioids and benzodiazepines [16] which is concerning in light of  
6  
7 the evidence of increased opioid-related death with co-prescription [17, 18]. The high prevalence  
8  
9 of off-label use of gabapentinoids in older comorbid patients who are vulnerable to adverse drug  
10  
11 events makes this class of drug an ideal target for deprescription.  
12  
13

14  
15 Multiple strategies exist to improve deprescription of potentially inappropriate  
16  
17 medications. One promising method includes the use of direct patient education through the  
18  
19 distribution of brochures, which have been studied for deprescribing benzodiazepines both in  
20  
21 hospital [19] and in the community [20]. These educational brochures contain knowledge self-  
22  
23 assessments, provide information on harms and benefits, present non-pharmacological  
24  
25 alternatives and propose tapering regimens. The goal of these brochures is to improve successful  
26  
27 deprescription by promoting patient motivation and self-capacity, as well as soliciting  
28  
29 opportunities for deprescription by encouraging patients to meet with their healthcare providers  
30  
31 [21]. Specific brochures exist for different classes of drugs, such as benzodiazepines, opioids,  
32  
33 gabapentinoids and proton pump inhibitors and are available on the Canadian Deprescribing  
34  
35 Network website (<https://www.deprescribingnetwork.ca/patient-handouts>). Here we present a  
36  
37 protocol for evaluating the efficacy of educational brochures for improving the deprescription of  
38  
39 gabapentinoids among hospitalized medical patients.  
40  
41  
42  
43  
44  
45

## 46 47 **Methods**

48  
49  
50 This prospective before and after study will take place on medicine clinical teaching units  
51  
52 of the McGill University Health Centre (comprised of 2 each at the Royal Victoria Hospital and the  
53  
54 Montreal General Hospital) in Montreal, Canada. The primary goal is improving deprescription of  
55  
56  
57  
58  
59  
60

1  
2  
3 gabapentinoids using a patient educational brochure designed in collaboration with the Canadian  
4  
5  
6 Deprescribing Network. Recruitment began in May 2021 and is expected to end in December  
7  
8 2022.  
9

### 10 ***Subject Selection, Inclusion and Exclusion Criteria***

11  
12  
13 Any patient admitted to one of the participating clinical teaching units that has a  
14  
15 prescription for gabapentin or pregabalin will be evaluated for the study. Patients will be  
16  
17 identified as gabapentinoids users from their “best possible medication history” obtained by the  
18  
19 unit pharmacist at the time of admission (this includes cross referencing community pharmacy  
20  
21 records with a detailed history with the patient to determine which medications they actually  
22  
23 take at home). Select patient demographics and co-morbidities will be collected from the detailed  
24  
25 admission note that is available for all patients on our medical teaching units.  
26  
27  
28  
29

30  
31 Participants must be 60 years or older and have an active pre-admission gabapentinoid  
32  
33 prescription that they confirm they are taking as prescribed at home. The 60-year cut-off was  
34  
35 selected as it was felt this group would benefit the most from a deprescribing intervention, given  
36  
37 the higher prevalence of polypharmacy and risk for potential adverse drug events. The  
38  
39 deprescribing brochures are also designed with the input of older adults and specifically address  
40  
41 changes in physiology that accompany the aging process to underscore the risks of  
42  
43 gabapentinoids. Exclusion criteria include having a known seizure disorder, not being enrolled in  
44  
45 the provincial public health insurance plan, previous enrollment in the study, estimated life  
46  
47 expectancy <3 months, inability to consent, major neurocognitive disorder, and inability to read  
48  
49 in English or French.  
50  
51  
52  
53

### 54 ***Trial Interventions***

1  
2  
3 All sites will begin in the control period of the trial. During this control period, participants  
4 will receive usual medical care. Participants will be informed that the goal of the trial is to  
5 evaluate their usual home pain medication and any trends in deprescribing at hospital discharge.  
6 They will be unaware that gabapentinoids are specifically studied, to reduce the risk of selection  
7 bias and of contamination of the control group. Furthermore, the medical staff will not receive  
8 specific information about the trial, or specific instructions with regards to deprescription. Once  
9 the target number of control participants are enrolled, all four sites will simultaneously transition  
10 to the intervention period. As medical staff and trainees rotate frequently between sites and  
11 units, and as this is an educational intervention, randomization at the level of the individual  
12 participant or at the level of the unit is not feasible (including stepped wedge design). Learned  
13 behaviour and access to the brochures would invariably lead to contamination of the control and  
14 thus a before-and-after study method was selected to minimize this source of bias in our data.  
15  
16  
17  
18  
19  
20  
21  
22  
23  
24  
25  
26  
27  
28  
29  
30  
31

32 The intervention period will consist of two components. First, participants will receive  
33 during their hospitalization an educational brochure on gabapentinoids, available in either  
34 English or French [22, 23]. Second, on a monthly basis at the beginning of each rotation, a short  
35 5-10 minute educational session about evidence for and against gabapentinoid use, the design  
36 and purpose of the study, and a brief overview of the purpose of the brochures will be delivered  
37 to physicians (staff and medical residents) at each site.  
38  
39  
40  
41  
42  
43  
44  
45  
46

#### 47 **Data Collection**

48  
49 All participants will provide written informed consent. Demographics and co-morbidities  
50 will be collected by trained research assistants from the participants and their medical record.  
51  
52 During the index admission, a first questionnaire will be administered in person and will collect  
53  
54  
55  
56  
57  
58  
59  
60



1  
2  
3 information about participant demographics, including age, gender and residence style  
4  
5 (independent, assisted living, etc.). We will also obtain a medication history (for study drugs) and  
6  
7 perform standardized questionnaires to assess global functioning, pain control and cognition [24-  
8  
9 26]. A follow-up questionnaire 8 weeks post hospital discharge will collect any changes in co-  
10  
11 morbidities or living situation, and will ask participants about planned or ongoing deprescribing  
12  
13 of their gabapentinoid (dose decrease, ongoing taper or stop), as well as initiation or dose  
14  
15 changes of other pain medications, such as opioids and non steroidal anti-inflammatory drugs  
16  
17 (NSAIDs). Finally, we will repeat the global functioning, pain control and cognition questionnaires.  
18  
19  
20  
21

### 22 **Outcomes**

23  
24  
25 The primary outcome will be deprescription of gabapentinoids at 8 weeks post-hospital  
26  
27 discharge, defined as complete cessation or dose reduction/taper with intention to stop.  
28  
29

30 Secondary outcomes assessed at 8 weeks post-hospital discharge will include:

- 31  
32 a. Dose reduction without intention to stop  
33  
34 b. Participant-reported outcomes: changes in global functioning scores, pain control  
35  
36 and cognitive function.  
37  
38 c. Initiation of new pain medications or increases in doses of pre-admission non-  
39  
40 gabapentinoid pain medications.  
41  
42  
43  
44

### 45 **Justification of Sample Size**

46  
47 The estimated sample size is 160 participants, with a 1:1 distribution between the  
48  
49 intervention and control groups. The control period event rate (deprescription) is expected to be  
50  
51 13% [16]. The sample size was calculated to detect an absolute increase of 20% in deprescription  
52  
53 rates with the intervention (number needed to treat 5), allowing for a two-sided type 1 error of  
54  
55  
56  
57  
58  
59  
60

1  
2  
3 5% and a type 2 error of 20% (132 subjects) and accounting for an up to 15% loss to follow up,  
4  
5 including death in hospital and post-discharge (156 subjects, rounded to 160).  
6  
7

### 8 ***Statistical Analysis and evaluation of results***

9

10  
11 We will provide a descriptive summary of the population enrolled in this study including  
12  
13 participant age, gender, comorbidities, type of gabapentinoid prescription, other co-  
14  
15 prescriptions, length of hospital stay and residence type.  
16  
17

18  
19 We will use an “intention to treat” principle, thus participants will be analyzed according  
20  
21 to their participation during the intervention or control period. Binary outcomes will be assessed  
22  
23 using binomial regression comparing the intervention to no intervention and adjusting for age  
24  
25 and sex. Continuous outcomes (T-scores) will be assessed using linear regression comparing the  
26  
27 intervention to no intervention adjusting for baseline values (T-scores), age and sex.  
28  
29  
30

31 We will perform several pre-planned subgroup analyses for the primary outcome,  
32  
33 including an analysis of participants aged 80 or older; an analysis based on discharge destination  
34  
35 (community vs long-term care facility) and an analysis looking at the effect of each clinical  
36  
37 teaching unit. Subgroup analyses will be treated as hypothesis generating and presented  
38  
39 graphically with 95% confidence intervals.  
40  
41  
42  
43

### 44 ***Ethics***

45

46 Ethics was granted by the McGill University Health Centre (MUHC) Research Ethics Board.  
47  
48

### 49 **Interpretation**

50  
51

### 52 ***Limitations***

53  
54  
55  
56  
57  
58  
59  
60

1  
2  
3 It will not be possible to blind participants or physicians in this study. However, this is  
4  
5 typical in pragmatic study designs and we do not expect that this will have a substantial impact  
6  
7 on our results. We have selected hard outcomes whenever possible, including validated  
8  
9 standardized questionnaires, that do not involve individual judgement by the assessor. In  
10  
11 addition, during the control period of this study all participants will be informed that the study  
12  
13 will be evaluating medications and deprescription trends but will not be made aware that  
14  
15 gabapentinoids will be studied specifically. We believe this will help to reduce selection bias.  
16  
17 Accordingly, medical staff will not be aware of the specifics of the study during the control period.  
18  
19  
20  
21  
22

23 Another issue we are aware of is that given the simultaneous crossover of all sites into  
24  
25 the intervention period, our study will be limited in our ability to account for temporal trends in  
26  
27 deprescription of gabapentinoids over the years, which could be influenced by factors such as  
28  
29 training level of junior residents or time-constraints from seasonal variations of workload  
30  
31 intensity on the clinical teaching unit. However, reassuringly, previous retrospective data has not  
32  
33 shown any temporal trends for gabapentinoid deprescribing on our medical wards [16].  
34  
35  
36  
37

### 38 ***Ethical Concerns***

39  
40

41 While we feel this intervention to be low risk to the participants involved, there are  
42  
43 several ethical concerns we are cognizant of. With regards to privacy concerns, some patients  
44  
45 may only agree to participate in the study if they are exempt from the follow up phone calls. This  
46  
47 wish will be respected and such patients will only be enrolled if they consent to our use of the  
48  
49 Dossier Santé Quebec (DSQ) provincial electronic medical record to evaluate the primary  
50  
51 endpoint but will be excluded from some of the secondary analyses.  
52  
53  
54  
55  
56  
57  
58  
59  
60

1  
2  
3 Special care will also need to be given to patients who are cognitively impaired or  
4  
5 otherwise unable to provide consent. Although this subpopulation of patients may still greatly  
6  
7 benefit from deprescription of potentially inappropriate medications, the educational brochures  
8  
9 used in this study rely on instigating motivation and providing self-capacity, and are therefore  
10  
11 aimed at patients who are cognitively intact or have only a mild form of cognitive impairment  
12  
13 [27]. Although distribution of the educational brochures to the patient's proxy could be  
14  
15 considered, this strategy is less feasible in the context of the SARS-CoV-2 pandemic, as family and  
16  
17 caregivers often have limited access to the bedside, hindering contact with medical staff, which  
18  
19 is crucial for initiation of the deprescription process.  
20  
21  
22  
23  
24

### 25 ***Dissemination Plan***

26  
27  
28 Results of this study will be disseminated through publication in a peer reviewed journal,  
29  
30 as well as through presentations in national conferences.  
31  
32

### 33 ***Conclusion***

34  
35  
36 Improving deprescription rates for potentially inappropriate medications is challenging,  
37  
38 especially given the numerous demands on physicians' and pharmacists' time in the inpatient  
39  
40 setting. Interventions must be simple, safe, and have strong evidence of efficacy if they are to be  
41  
42 adopted into the workflow of busy healthcare teams, and thus evidence-based solutions are  
43  
44 needed to address the issue of polypharmacy. Educational brochures, while by no means a  
45  
46 complete solution, represent a good starting point as they have many of the characteristics of an  
47  
48 ideal intervention. They are low-tech, inexpensive, safe, easy to administer, and aimed at  
49  
50 bringing patients into the decision. As previous trials have shown, they have been highly effective  
51  
52  
53  
54  
55  
56  
57  
58  
59  
60

1  
2  
3 in improving deprescription of benzodiazepines and sedative hypnotics [19, 20] as well as first-  
4  
5 generation antihistamines, glyburide and nonsteroidal anti-inflammatory drugs [28]. This study  
6  
7 seeks to provide evidence that the gabapentinoid brochure can demonstrate a similar efficacy if  
8  
9 targeted to hospitalized patients and would represent a scalable intervention for combatting  
10  
11 gabapentinoid overuse, as well as encouraging conversations that lead to deprescribing.  
12  
13  
14  
15  
16  
17  
18  
19

### **Data-Sharing Statement**

20  
21  
22  
23 All data collected in this study will be available upon request to the study authors at the  
24  
25 email of correspondence indicated on the title page.  
26  
27  
28  
29  
30  
31  
32  
33  
34  
35  
36  
37  
38  
39  
40  
41  
42  
43  
44  
45  
46  
47  
48  
49  
50  
51  
52  
53  
54  
55  
56  
57  
58  
59  
60

## References

1. U.S. Food and Drug Administration. *LYRICA - Highlights of Prescribing Information*. 2012; Available from:  
[https://www.accessdata.fda.gov/drugsatfda\\_docs/label/2012/021446s028lbl.pdf](https://www.accessdata.fda.gov/drugsatfda_docs/label/2012/021446s028lbl.pdf).
2. U.S. Food and Drug Administration. *NEURONTIN - Highlights of Prescribing Information*. 2017; Available from:  
[https://www.accessdata.fda.gov/drugsatfda\\_docs/label/2017/020235s064\\_020882s047\\_021129s046lbl.pdf](https://www.accessdata.fda.gov/drugsatfda_docs/label/2017/020235s064_020882s047_021129s046lbl.pdf).
3. Pfizer Canada Inc. *Product Monograph - Lyrica*. 2016; Available from:  
[https://www.pfizer.ca/sites/g/files/g10037206/f/201710/LYRICA\\_DC\\_PM\\_198215\\_6Dec2016\\_E.pdf](https://www.pfizer.ca/sites/g/files/g10037206/f/201710/LYRICA_DC_PM_198215_6Dec2016_E.pdf).
4. Pfizer Canada Inc. *Product Monograph - Neurontin*. 2018; Available from:  
[https://pdf.hres.ca/dpd\\_pm/00044022.PDF](https://pdf.hres.ca/dpd_pm/00044022.PDF).
5. Johansen, M.E., *Gabapentinoid Use in the United States 2002 Through 2015*. JAMA Intern Med, 2018. **178**(2): p. 292-294.

- 1  
2  
3  
4  
5  
6  
7  
8  
9  
10  
11  
12  
13  
14  
15  
16  
17  
18  
19  
20  
21  
22  
23  
24  
25  
26  
27  
28  
29  
30  
31  
32  
33  
34  
35  
36  
37  
38  
39  
40  
41  
42  
43  
44  
45  
46  
47  
48  
49  
50  
51  
52  
53  
54  
55  
56  
57  
58  
59  
60
6. Kwok, H., et al., *Impact of Unrestricted Access to Pregabalin on the Use of Opioids and Other CNS-Active Medications: A Cross-Sectional Time Series Analysis*. *Pain Med*, 2017. **18**(6): p. 1019-1026.
  7. *Medicines use and spending in the U.S. — a review of 2016 and outlook to 2021*. 2017; Available from: [https://structurecms-staging-psyclone.netdna-ssl.com/client\\_assets/dwonk/media/attachments/590c/6aa0/6970/2d2d/4182/0000/590c6aa069702d2d41820000.pdf?1493985952](https://structurecms-staging-psyclone.netdna-ssl.com/client_assets/dwonk/media/attachments/590c/6aa0/6970/2d2d/4182/0000/590c6aa069702d2d41820000.pdf?1493985952).
  8. Hamer, A.M., et al., *Gabapentin use in a managed medicaid population*. *J Manag Care Pharm*, 2002. **8**(4): p. 266-71.
  9. Bennett, M.I., et al., *Pregabalin for the management of neuropathic pain in adults with cancer: a systematic review of the literature*. *Pain Medicine*, 2013. **14**(11): p. 1681-8.
  10. Mathieson, S., et al., *Trial of Pregabalin for Acute and Chronic Sciatica*. *New England Journal of Medicine*, 2017. **376**(12): p. 1111-1120.
  11. Moore, A., S. Derry, and P. Wiffen, *Gabapentin for Chronic Neuropathic Pain*. *Jama*, 2018. **319**(8): p. 818-819.

- 1  
2  
3 12. Shanthanna, H., et al., *Benefits and safety of gabapentinoids in chronic low back pain: A*  
4  
5 *systematic review and meta-analysis of randomized controlled trials*. PLoS Medicine /  
6  
7 Public Library of Science, 2017. **14**(8): p. e1002369.  
8  
9
- 10  
11  
12 13. Wiffen, P.J., et al., *Antiepileptic drugs for neuropathic pain and fibromyalgia - an*  
13  
14 *overview of Cochrane reviews*. Cochrane Database of Systematic Reviews, 2013(11): p.  
15  
16 CD010567.  
17  
18
- 19  
20  
21 14. Jette, N., et al., *Association of antiepileptic drugs with nontraumatic fractures: a*  
22  
23 *population-based analysis*. Arch Neurol, 2011. **68**(1): p. 107-12.  
24  
25  
26  
27
- 28  
29 15. Toth, C., *Drug safety evaluation of pregabalin*. Expert Opinion on Drug Safety, 2012.  
30  
31 **11**(3): p. 487-502.  
32  
33  
34
- 35  
36 16. Gingras, M.A., et al., *Retrospective Cohort Study of the Prevalence of Off-label*  
37  
38 *Gabapentinoid Prescriptions in Hospitalized Medical Patients*. J Hosp Med, 2019. **14**(9):  
39  
40 p. E1-e4.  
41  
42  
43  
44
- 45 17. Gomes, T., et al., *Pregabalin and the Risk for Opioid-Related Death: A Nested Case-*  
46  
47 *Control Study*. Ann Intern Med, 2018. **169**(10): p. 732-734.  
48  
49  
50
- 51  
52 18. Gomes, T., et al., *Gabapentin, opioids, and the risk of opioid-related death: A population-*  
53  
54 *based nested case-control study*. PLoS Med, 2017. **14**(10): p. e1002396.  
55  
56  
57  
58  
59  
60



- 1  
2  
3  
4  
5  
6  
7  
8  
9  
10  
11  
12  
13  
14  
15  
16  
17  
18  
19  
20  
21  
22  
23  
24  
25  
26  
27  
28  
29  
30  
31  
32  
33  
34  
35  
36  
37  
38  
39  
40  
41  
42  
43  
44  
45  
46  
47  
48  
49  
50  
51  
52  
53  
54  
55  
56  
57  
58  
59  
60
19. Wilson, M.G., et al., *EMPOWERing Hospitalized Older Adults to Deprescribe Sedative Hypnotics: A Pilot Study*. Journal of the American Geriatrics Society, 2018. **66**(6): p. 1186-1189.
  20. Tannenbaum, C., et al., *Reduction of inappropriate benzodiazepine prescriptions among older adults through direct patient education: the EMPOWER cluster randomized trial*. JAMA Intern Med, 2014. **174**(6): p. 890-8.
  21. Martin, P. and C. Tannenbaum, *A realist evaluation of patients' decisions to deprescribe in the EMPOWER trial*. BMJ Open, 2017. **7**(4): p. e015959.
  22. Canadian Deprescribing Network. *Gabapentinoid (gabapentin and pregabalin) medications*. Available from:  
[https://static1.squarespace.com/static/5836f01fe6f2e1fa62c11f08/t/5f4f9501ca1e2c27719f7a77/1599051021132/Gabapentinoids\\_EN\\_Brochure.pdf](https://static1.squarespace.com/static/5836f01fe6f2e1fa62c11f08/t/5f4f9501ca1e2c27719f7a77/1599051021132/Gabapentinoids_EN_Brochure.pdf).
  23. Réseau canadien pour la déprescription. *Les médicaments gabapentinoïdes*. Available from:  
[https://static1.squarespace.com/static/5b228b21b27e39f258f12ae0/t/5f4faf474204207f6ac40208/1599057756901/Gabapentinoids\\_FR\\_Brochure.pdf](https://static1.squarespace.com/static/5b228b21b27e39f258f12ae0/t/5f4faf474204207f6ac40208/1599057756901/Gabapentinoids_FR_Brochure.pdf).

- 1  
2  
3  
4  
5  
6  
7  
8  
9  
10  
11  
12  
13  
14  
15  
16  
17  
18  
19  
20  
21  
22  
23  
24  
25  
26  
27  
28  
29  
30  
31  
32  
33  
34  
35  
36  
37  
38  
39  
40  
41  
42  
43  
44  
45  
46  
47  
48  
49  
50  
51  
52  
53  
54  
55  
56  
57  
58  
59  
60
24. *PROMIS Scale v1.2 - Global Health*. Available from:  
[https://www.healthmeasures.net/index.php?option=com\\_instruments&view=measure&id=778&Itemid=992](https://www.healthmeasures.net/index.php?option=com_instruments&view=measure&id=778&Itemid=992).
25. *PROMIS Short Form v2.0 - Pain Intensity - 3a*. Available from:  
[https://www.healthmeasures.net/index.php?option=com\\_instruments&view=measure&id=3379&Itemid=992](https://www.healthmeasures.net/index.php?option=com_instruments&view=measure&id=3379&Itemid=992).
26. *PROMIS Short Form v2.0 - Cognitive Function 6a*. Available from:  
[https://www.healthmeasures.net/index.php?option=com\\_instruments&view=measure&id=768&Itemid=992](https://www.healthmeasures.net/index.php?option=com_instruments&view=measure&id=768&Itemid=992).
27. Martin, P. and C. Tannenbaum, *Use of the EMPOWER brochure to deprescribe sedative-hypnotic drugs in older adults with mild cognitive impairment*. BMC Geriatr, 2017. **17**(1): p. 37.
28. Martin, P., et al., *Effect of a Pharmacist-Led Educational Intervention on Inappropriate Medication Prescriptions in Older Adults: The D-PRESCRIBE Randomized Clinical Trial*. JAMA, 2018. **320**(18): p. 1889-1898.
